# Supplementary material for: Optimizing clozapine for chemogenetic neuromodulation of somatosensory cortex
Source: PubMed Central journal article supplement (PMC7138833; doi:10.1038/s41598-020-62923-x), 2020-04-07
Supplement: 41598_2020_62923_MOESM1_ESM.pdf [file 41598_2020_62923_MOESM1_ESM.pdf]

**Supplementary Material for**  
**Optimizing clozapine for chemogenetic neuromodulation of**  
**somatosensory cortex**

Jongwook Cho<sup>1†</sup>, Seungjun Ryu<sup>1†</sup>, Sunwoo Lee<sup>1</sup>, Junsoo Kim<sup>1</sup>, Hyung-Ihl Kim<sup>1,2\*</sup>

<sup>1</sup>Department of Biomedical Science and Engineering, Gwangju Institute of Science and Technology, Gwangju, Republic of Korea.

<sup>2</sup>Department of Neurosurgery, Presbyterian Medical Center, Jeonju, Republic of Korea.

\*Corresponding author. Email : [hyoungihl@gist.ac.kr](mailto:hyoungihl@gist.ac.kr)

**This PDF file includes:**

Supplementary Figs. S1 to S3

Supplementary Figure 1. FDG-microPET image after administration of saline and different dose of CLZ.

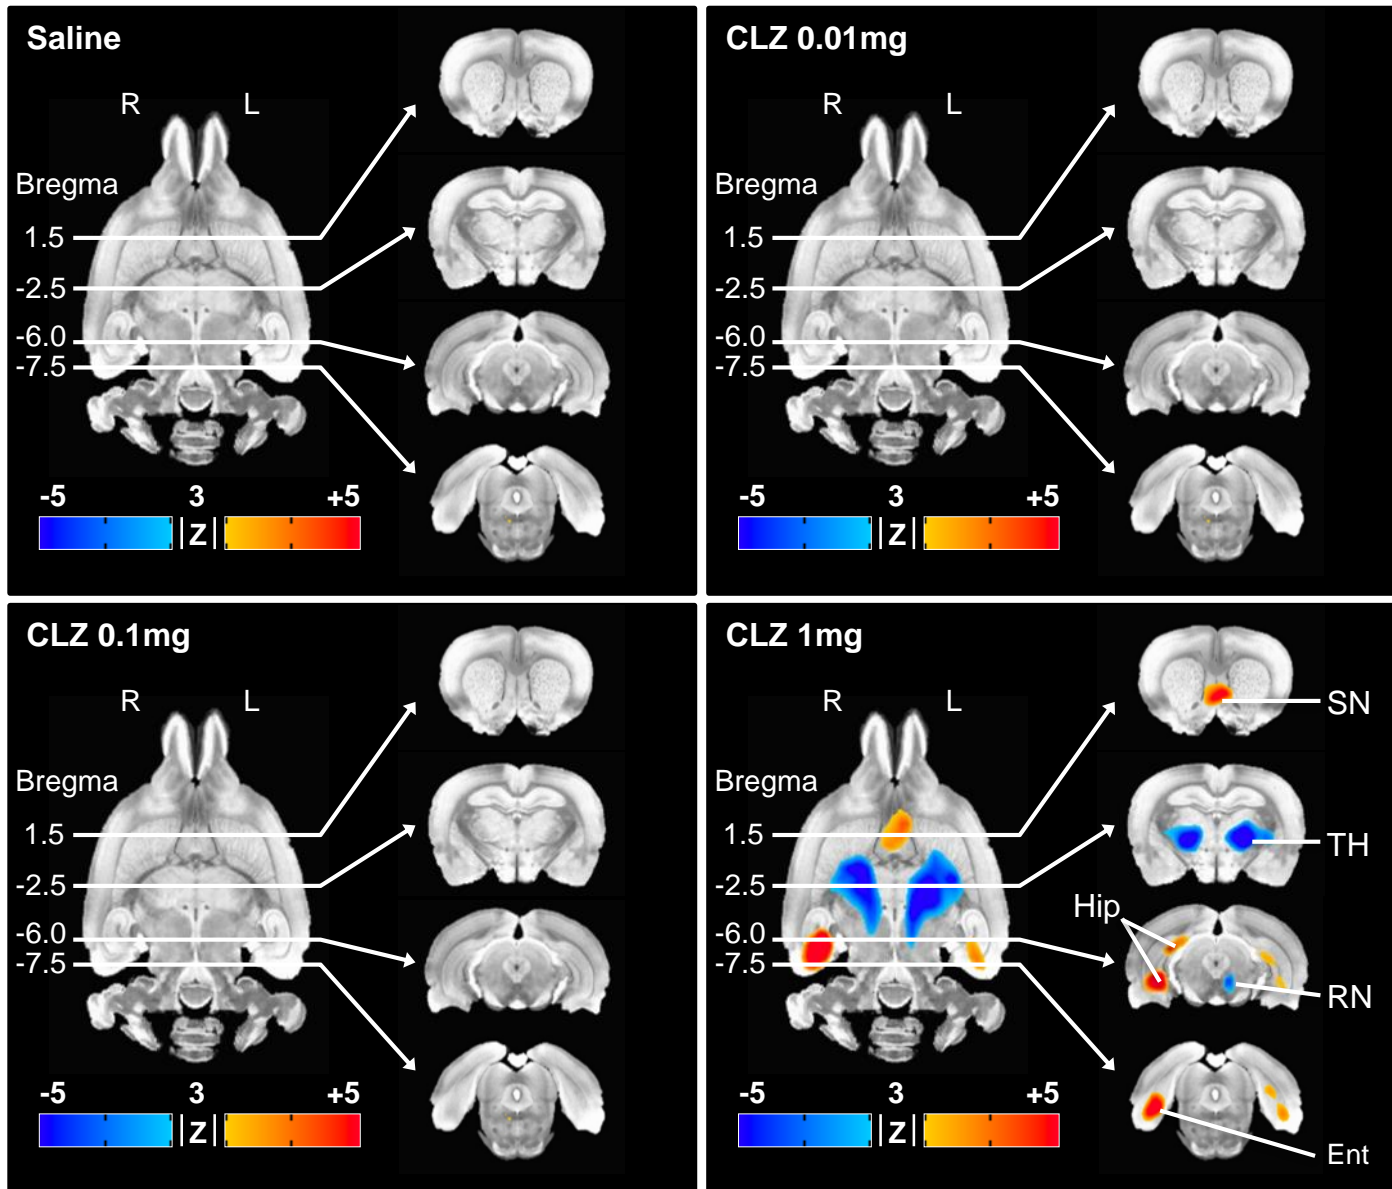

FDG-microPET image after different dose of CLZ and saline in wild rat. (N = 8; 3dClustSim, AFNI,  $\alpha = 0.05$ ,  $p < 0.01$ ,  $k < 39$ ). CLZ, clozapine; L, left; R, right; SN, septal nucleus; TH, thalamus; RN, red nucleus; Hip, hippocampus; Ent, entorhinal cortex

Supplementary Figure 2. Comparison of SUV in somatosensory cortex with different dose of CLZ –induced chemogenetic neuromodulation.

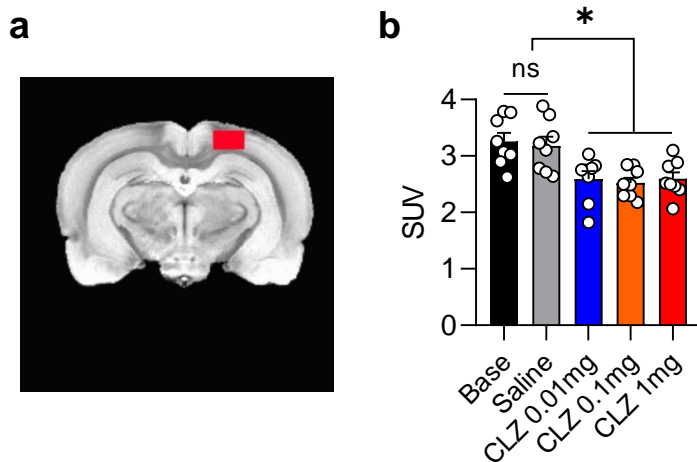

(a) Coronal image of a rat brain indicating the region of interest for SUV analysis (red box). (b) SUV for regional glucose metabolism in somatosensory cortex after CLZ-ChemoNM. (N = 8; 1-way ANOVA with Tukey`s multiple comparisons, \* $p < 0.05$ ).

Supplementary Figure 3. Locomotor behavioral changes after CLZ-ChemoNM

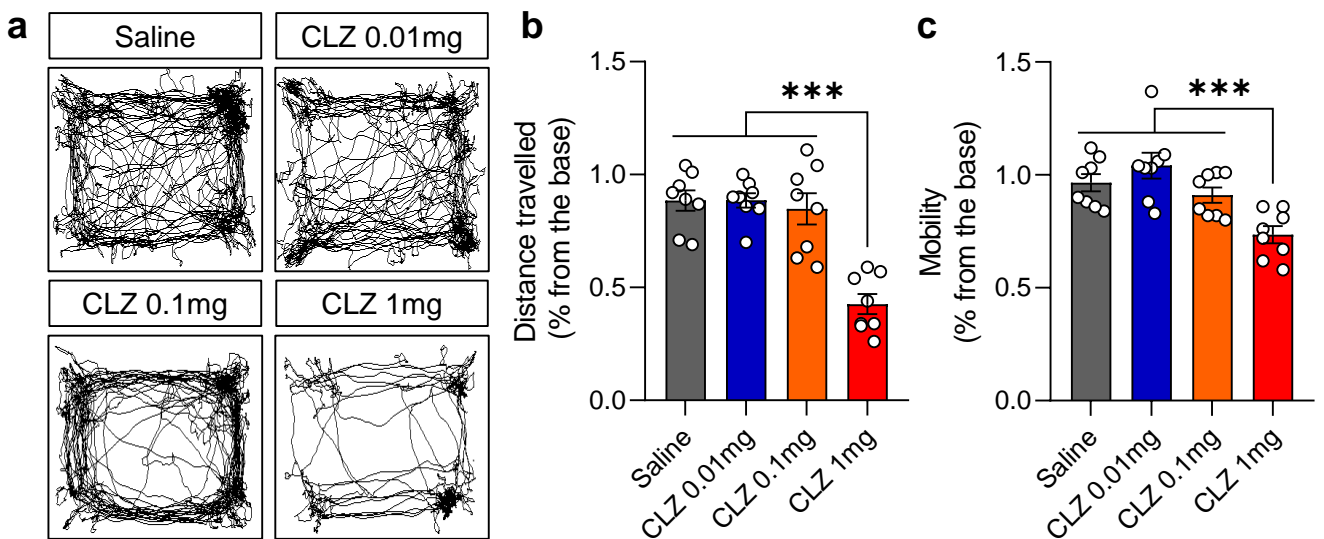

(a) Representative traces of locomotor activity in open field test after CLZ-ChemoNM  
(b) Total distance travel and (c) mobility 30 minute after administration of CLZ or saline in open field test during 30 minutes (N = 8; 1-way ANOVA with Tukey`s multiple comparisons,  $*p < 0.05$ ).
